# Supplementary material
Source: Elsevier journal article supplement (https://comptes-rendus.academie-sciences.fr/chimie/article/10.1016/j.crci.2015.09.009/file/attach/mmc1.pdf)

# Unexpected synthesis of aziridines under Cu(I) catalyzed Kinugasa conditions assisted by microwaves irradiation

Heithem Abda,<sup>a</sup> Kaïss Aouadi,<sup>a,\*</sup> Jihed Brahmî,<sup>a</sup> Moncef Msaddek,<sup>a</sup> and Sébastien Vidal<sup>b</sup>

## Experimental Section

**General methods:** Thin-layer chromatography (TLC) was carried out on aluminum sheets coated with silica gel 60 F<sub>254</sub> (Merck). <sup>1</sup>H and <sup>13</sup>C NMR spectra were recorded using a Bruker DRX400 spectrometer with the residual solvent as the internal standard. The chemical shifts are expressed on the  $\delta$  scale in parts per million (ppm). The following abbreviations are used to explain the observed multiplicities: s, singlet; d, doublet; dd, doublet of doublets; ddd, doublet of doublet of doublets; t, triplet; m, multiplet; br, broad. NMR solvents were purchased from Eurisotop (Saint Aubin, France). MS (ESI) data were recorded in the positive mode using a Bruker MicrOTOF-Q II spectrometer. Structure elucidation was deduced from 1D and 2D NMR spectroscopy which allowed signal assignments based on COSY and HSQC correlations and by X-ray diffraction analysis.

### General Procedure: Reaction of nitron 1 with alkynes.

In a Biotage Initiator 5-mL vial, CuI (100 mg) was suspended in anhydrous DMF (1 mL). The vial was flushed with argon and Et<sub>3</sub>N (3 eq, 1.26 mmol, 127 mg), then alkyne (4eq, 1.68 mmol) was added. The solution was stirred for 10 min at 0°C and nitron 1 (1 eq, 0.42 mmol, 100 mg) in anhydrous DMF (1 mL) was added. The vial was sealed with a septum cap and was irradiated by microwaves at 100°C. TLC monitoring (EtOAc/PE 5/5) showed full conversion after 2 h. The crude mixture was dissolved in biphasic mixture (EtOAc/H<sub>2</sub>O, 50 mL, 1/1). The aqueous layer was separated and then extracted with EtOAc (3×10 mL). The organic layers were combined and washed with brine (2×30 mL), dried (Na<sub>2</sub>SO<sub>4</sub>), filtered, concentrated and purified by flash silica gel column chromatography (EtOAc/PE 1/3) to provide aziridines 3-4.

### (1'R,2'S,5S,5'R,6R)-6-benzoyl-2'-isopropyl-3,5'-dimethyl-1,3-diazaspiro[bicyclo[3.1.0]hexane-2,1'-cyclohexan]-4-one (4a)

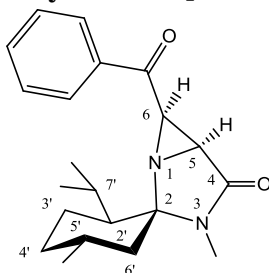

Obtained as a white solid (75 mg, 52%) following general procedure: alkyne 2a (171 mg).

(4a) White solid ; M.p. 182–183°C (Et<sub>2</sub>O); R<sub>f</sub> = 0.46 (EtOAc/PE, 5/5); [ $\alpha$ ]<sub>D</sub><sup>20</sup> = -85.7 (c = 0.2, CH<sub>2</sub>Cl<sub>2</sub>); <sup>1</sup>H NMR (400 MHz, CDCl<sub>3</sub>):  $\delta$  = 0.34 (d, 3H, J = 6.6 Hz, CH<sub>3</sub>), 0.85 (d, 3H, J = 5.84 Hz, CH<sub>3</sub>), 0.86 (d, 3H, J = 5.92 Hz, CH<sub>3</sub>), 0.89-0.92 (m, 1H), 1.05 (t, 1H, J<sub>gem</sub> = 12.1 Hz), 1.11-1.16 (m, 1H), 1.38 (ddd, 1H, J = 9.0 Hz, J = 3.4 Hz, J = 1.1 Hz), 1.62 (dq, 1H, J = 10.2, J = 7.8, J = 4.7 Hz), 1.69-1.73 (m, 1H), 1.78-1.79 (m, 1H), 1.85-1.89 (m, 1H), 1.91-2.02 (m, 1H), 2.59 (s, 3H, NCH<sub>3</sub>), 3.14 (d, 1H, J = 5.1 Hz), 3.57 (d, 1H, J = 5.1 Hz), 7.47-7.52 (m, 2H, Harom), 7.62 (tt, 1H, J = 6.1 Hz, J = 4.2 Hz, J = 1.3 Hz, Harom), 8.07-8.15 (m, 2H, Harom); <sup>13</sup>C NMR (100 MHz, CDCl<sub>3</sub>):  $\delta$  = 18.3, 21.3, 21.8, 24.2, 24.5, 25.5 (NCH<sub>3</sub>), 29.2,

34.8, 42.3, 42.9, 44.9, 49.6, 85.7, 128.4, 128.9, 134.1, 137.3, 169.6 (C=O), 193.6(C=O);  
HRMS (ESI):  $m/z$  calcd for  $C_{21}H_{29}N_2O_2[M+H]^+$  341.2224; found 341.2228.

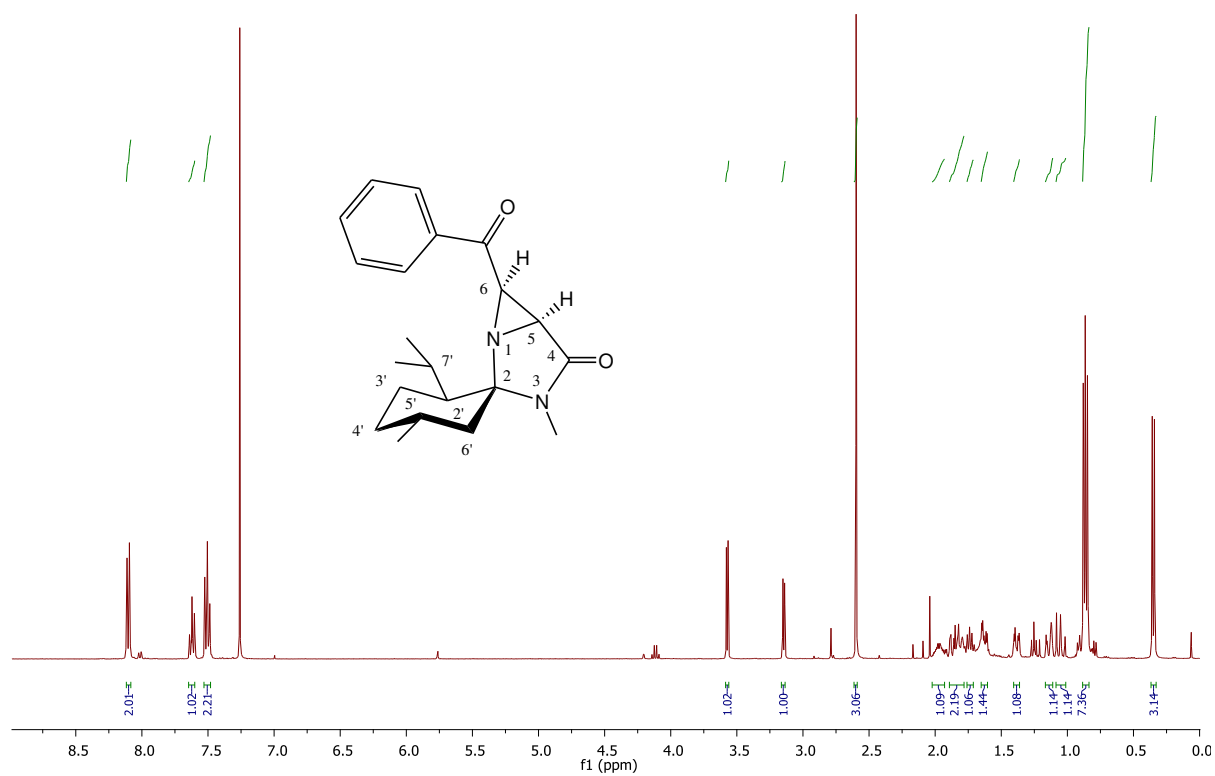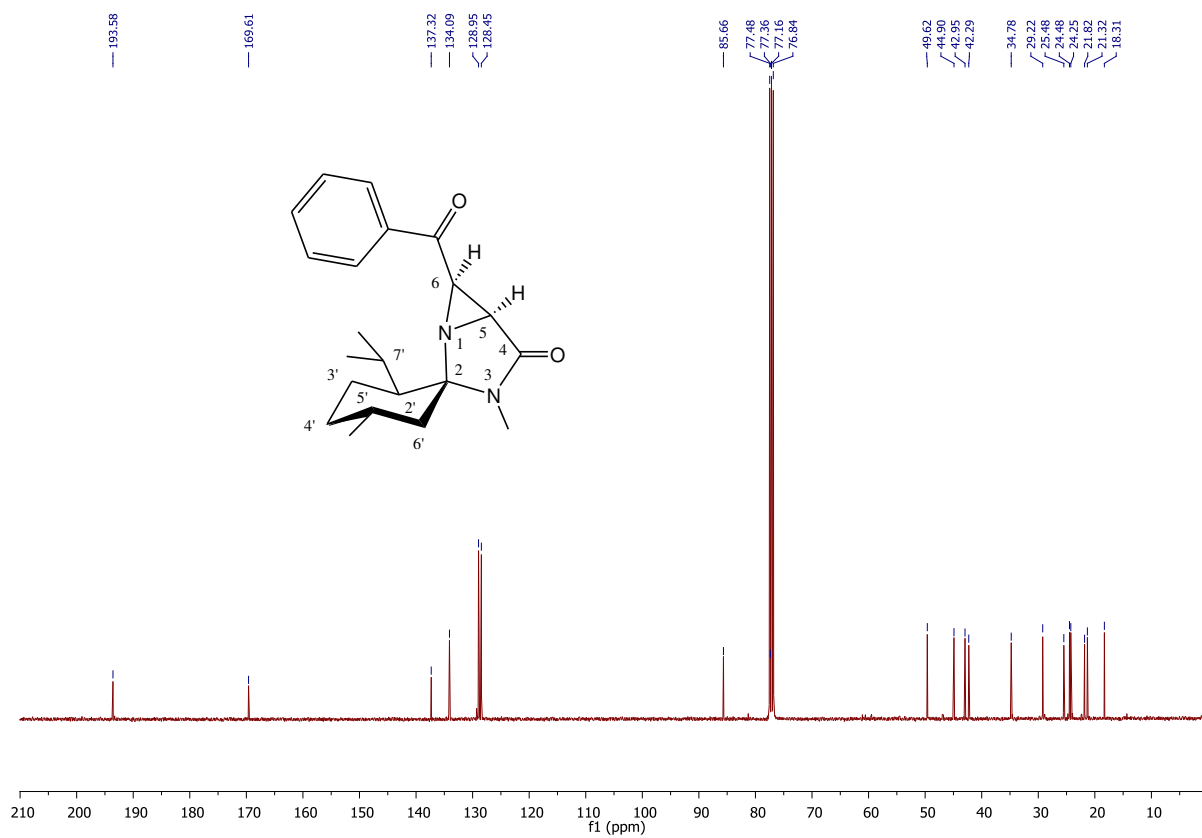

**(1'R,2'S,5S,5'R,6S)-2'-isopropyl-3,5'-dimethyl-6-(4-methylbenzoyl)-1,3-diazaspiro[bicyclo[3.1.0]hexane-2,1'-cyclohexan]-4-one (3b) and (1'R,2'S,5S,5'R,6R)-2'-isopropyl-3,5'-dimethyl-6-(4-methylbenzoyl)-1,3-diazaspiro[bicyclo[3.1.0]hexane-2,1'-cyclohexan]-4-one (4b)**

Compounds **3b** (47 mg, 13%) and **4b** (190 mg, 53%) were obtained following general procedure: alkyne **2b** (194 mg).

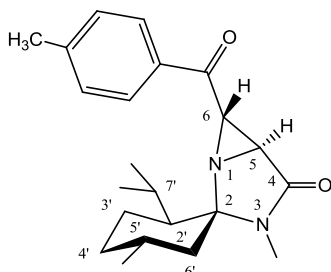

**(3b)** Yellow amorphous solid;  $R_f = 0.56$  (EtOAc/PE, 5/5);  $[\alpha]_D^{20} = +100.0$  ( $c = 0.2$ ,  $\text{CH}_2\text{Cl}_2$ );  $^1\text{H NMR}$  (400 MHz,  $\text{CDCl}_3$ ):  $\delta = 0.87$  (d, 6H,  $J = 6.7$  Hz, 2 $\text{CH}_3$ ), 0.93 (d, 3H,  $J = 6.8$  Hz,  $\text{CH}_3$ ), 0.94-0.96 (m, 1H), 1.05 (t, 1H,  $J_{\text{gem}} = 12.8$  Hz), 1.48-1.52 (m, 1H), 1.61-1.66 (m, 3H), 1.77-1.80 (m, 1H), 1.89-1.92 (m, 2H), 2.42 (s, 3H,  $\text{CH}_3$ ), 2.65 (s, 3H,  $\text{NCH}_3$ ), 3.24 (d, 1H,  $J = 2.0$  Hz), 3.30 (d, 1H,  $J = 1.7$  Hz), 7.27 (d, 2H,  $J = 8.0$  Hz, Harom), 7.88 (d, 2H,  $J = 8.2$  Hz, Harom);  $^{13}\text{C NMR}$  (100 MHz,  $\text{CDCl}_3$ ):  $\delta = 18.3$ , 21.3, 21.9, 22.3, 24.1, 24.6, 25.5 ( $\text{NCH}_3$ ), 28.7, 34.7, 39.8, 43.2, 45.5, 48.1, 85.7, 128.6, 129.6, 134.0, 145.0, 170.8 ( $\text{C}=\text{O}$ ), 192.7 ( $\text{C}=\text{O}$ ); HRMS (ESI):  $m/z$  calcd for  $\text{C}_{22}\text{H}_{31}\text{N}_2\text{O}_2[\text{M}+\text{H}]^+$  355.2380; found 355.2378.

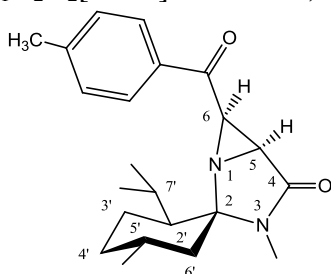

**(4b)** White solid; M.p. 177–178°C ( $\text{Et}_2\text{O}$ );  $R_f = 0.42$  (EtOAc/PE, 5/5);  $[\alpha]_D^{20} = -9.8$  ( $c = 0.7$ ,  $\text{CH}_2\text{Cl}_2$ );  $^1\text{H NMR}$  (400 MHz,  $\text{CDCl}_3$ ):  $\delta = 0.36$  (d, 3H,  $J = 6.6$  Hz,  $\text{CH}_3$ ), 0.85 (d, 3H,  $J = 6.6$  Hz,  $\text{CH}_3$ ), 0.87 (d, 3H,  $J = 6.3$  Hz,  $\text{CH}_3$ ), 0.90-0.96 (m, 1H), 1.03 (t, 1H,  $J_{\text{gem}} = 13.4$  Hz), 1.14-1.19 (m, 1H), 1.38 (ddd, 1H,  $J = 9.1$  Hz,  $J = 3.4$  Hz,  $J = 1.1$  Hz), 1.59-1.65 (m, 1H), 1.68-1.75 (m, 1H), 1.79-1.85 (m, 2H), 1.93-2.00 (m, 1H), 2.42 (s, 3H,  $\text{CH}_3$ ), 2.59 (s, 3H,  $\text{NCH}_3$ ), 3.14 (d, 1H,  $J = 5.1$  Hz), 3.56 (d, 1H,  $J = 5.1$  Hz), 7.27-7.30 (m, 2H, Harom), 7.98-8.00 (m, 2H, Harom);  $^{13}\text{C NMR}$  (100 MHz,  $\text{CDCl}_3$ ):  $\delta = 18.3$ , 21.4 ( $\text{CH}_3$ ), 21.8, 21.9, 24.2, 24.5, 25.5 ( $\text{NCH}_3$ ), 29.2, 34.8, 42.2, 43.0, 44.9, 49.6, 85.6, 128.6, 129.6, 135.0, 145.1, 169.7 ( $\text{C}=\text{O}$ ), 193.2 ( $\text{C}=\text{O}$ ); HRMS (ESI):  $m/z$  calcd for  $\text{C}_{22}\text{H}_{31}\text{N}_2\text{O}_2[\text{M}+\text{H}]^+$  355.2380; found 355.2371.

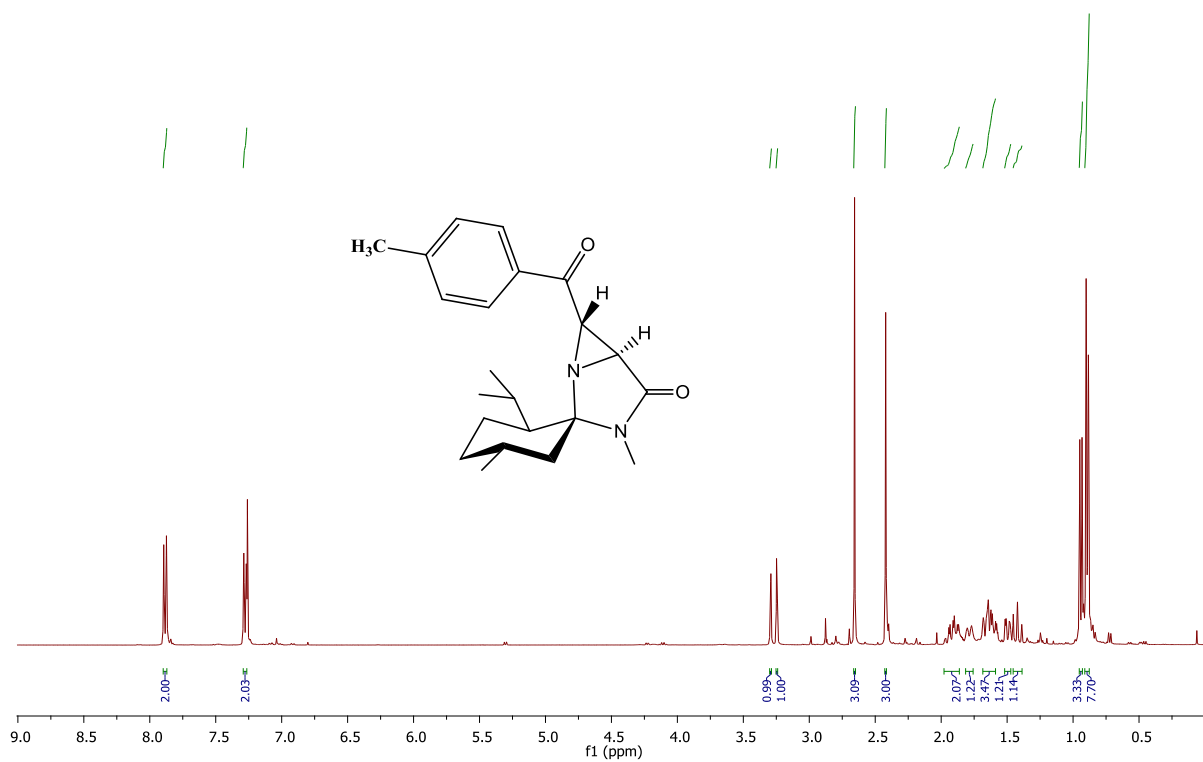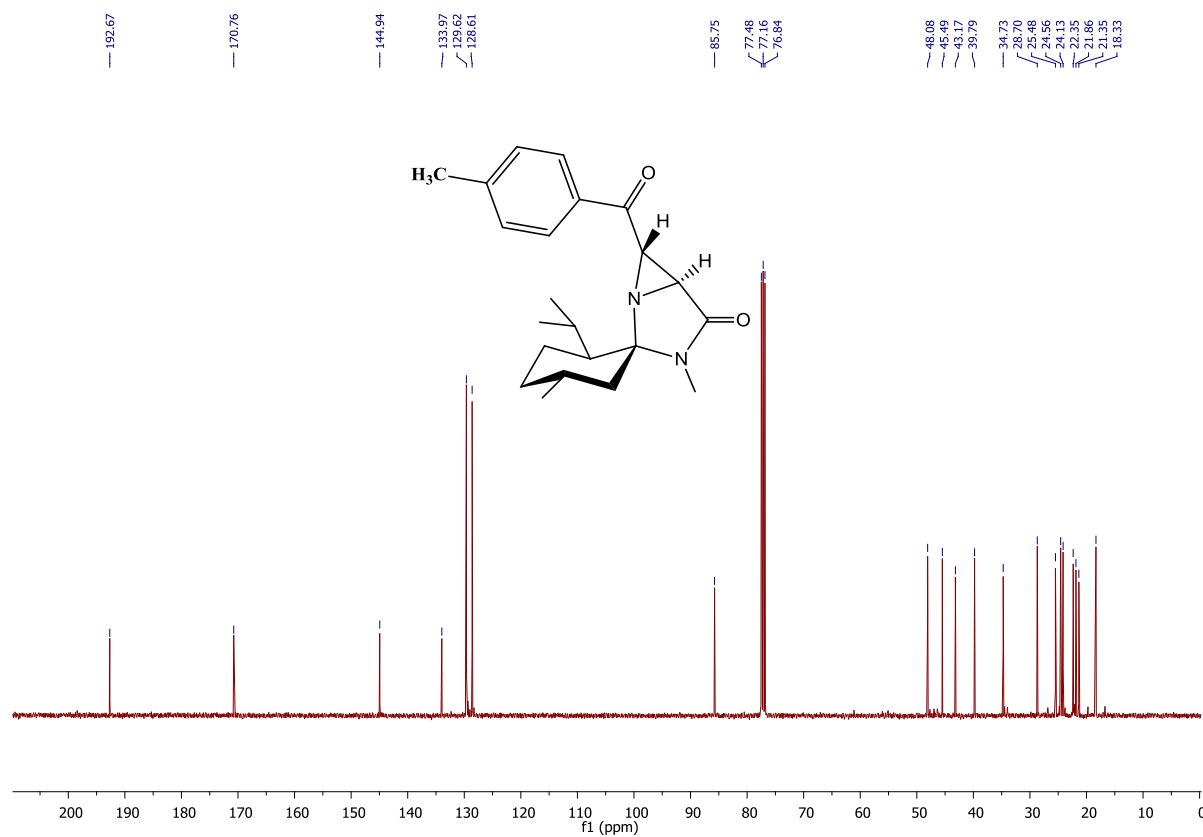

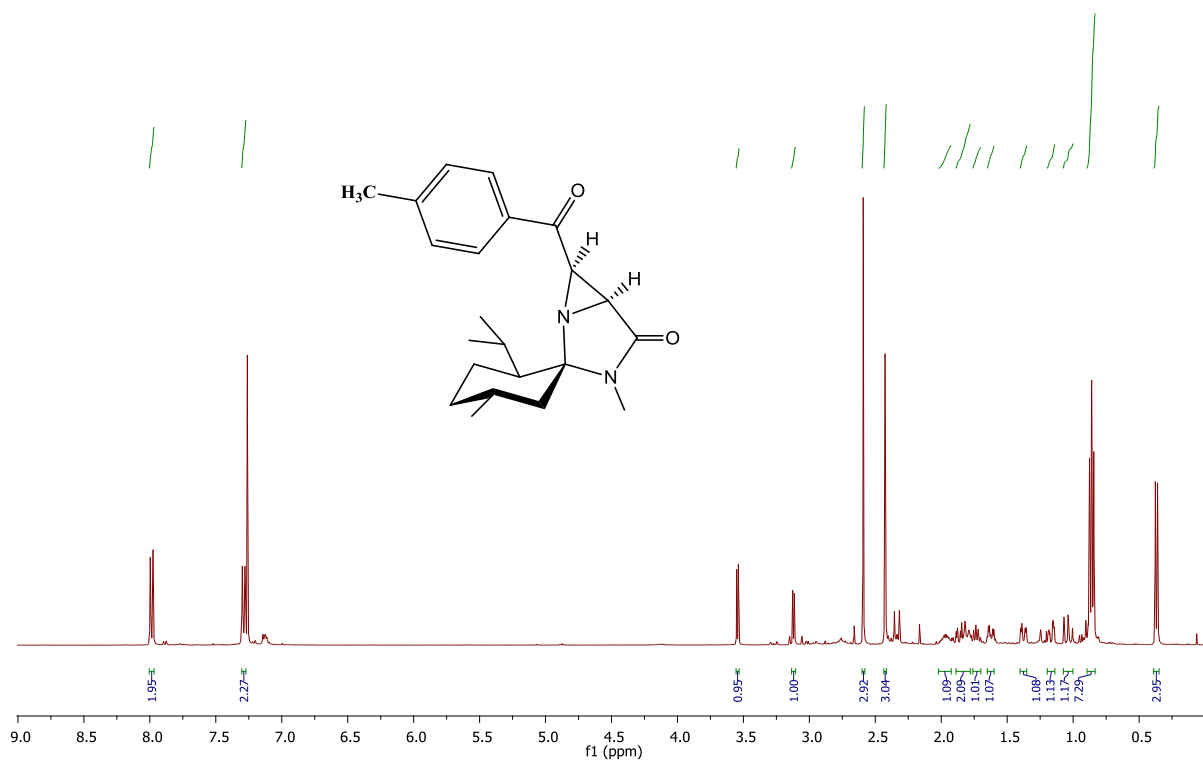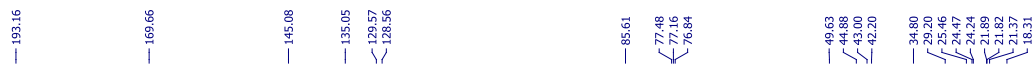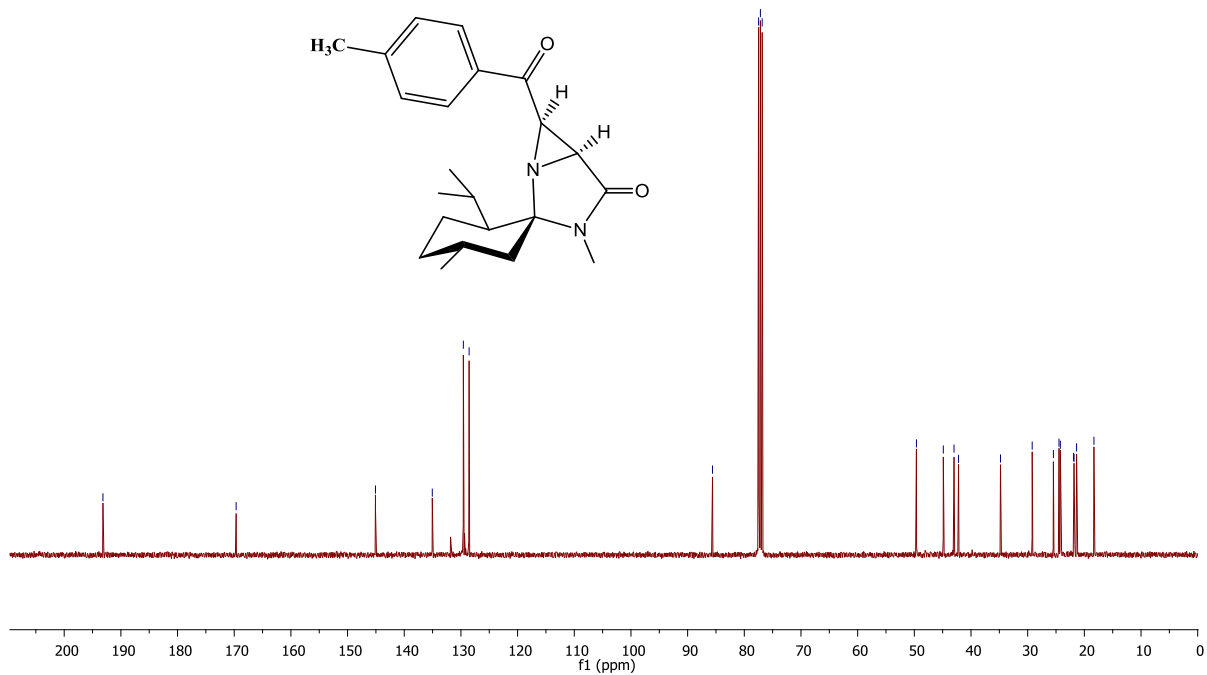

**(1'R,2'S,5S,5'R,6S)-2'-isopropyl-6-(4-methoxybenzoyl)-3,5'-dimethyl-1,3-diazaspiro[bicyclo[3.1.0]hexane-2,1'-cyclohexan]-4-one (3c) and (1'R,2'S,5S,5'R,6R)-2'-isopropyl-6-(4-methoxybenzoyl)-3,5'-dimethyl-1,3-diazaspiro[bicyclo[3.1.0]hexane-2,1'-cyclohexan]-4-one (4c)**

Compounds **3c** (80 mg, 21%) and **4c** (194 mg, 52%) were obtained following general procedure: alkyne **2c** (221 mg).

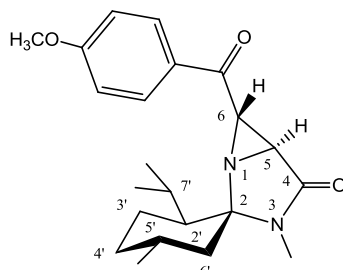

**(3c)**\* Yellow amorphous solid;  $R_f = 0.38$  (EtOAc/PE, 5/5);  $^1\text{H NMR}$  (400 MHz,  $\text{CDCl}_3$ ):  $\delta = 0.90$  (d, 6H,  $J = 6.7$  Hz, 2 $\text{CH}_3$ ), 0.94 (d, 3H,  $J = 6.8$  Hz,  $\text{CH}_3$ ), 0.96-0.99 (m, 1H), 1.21-1.27 (m, 1H), 1.50 (ddd, 1H,  $J = 8.8$  Hz,  $J = 3.5$  Hz,  $J = 1.1$  Hz), 1.59-1.65 (m, 3H), 1.76-1.79 (m, 3H), 2.66 (s, 3H,  $\text{NCH}_3$ ), 3.22 (d, 1H,  $J = 2.0$  Hz), 3.29 (d, 1H,  $J = 1.8$  Hz), 3.88 (s, 3H,  $\text{OCH}_3$ ), 6.95 (dt, 2H,  $J = 8.9$  Hz,  $J = 2.8$  Hz, H-arom), 7.98 (dt, 2H,  $J = 8.9$  Hz,  $J = 3.2$  Hz, H-arom).  $^{13}\text{C NMR}$  (100 MHz,  $\text{CDCl}_3$ ):  $\delta = 18.3, 21.4, 22.4, 24.2, 24.6, 25.5$  ( $\text{NCH}_3$ ), 28.7, 34.8, 39.8, 43.2, 45.4, 48.1, 55.7 ( $\text{OCH}_3$ ), 85.7, 114.1, 130.7, 131.0, 164.1, 170.7 ( $\text{C}=\text{O}$ ), 191.3 ( $\text{C}=\text{O}$ ); HRMS (ESI):  $m/z$  calcd for  $\text{C}_{22}\text{H}_{31}\text{N}_2\text{O}_3[\text{M}+\text{H}]^+$  371.2320; found 371.2317.

\* Compound **3c** is contaminated by unknown products.

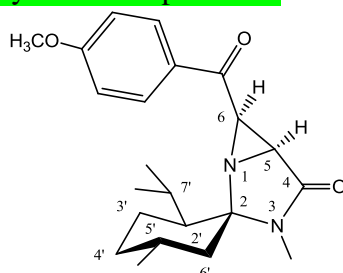

**(4c)** White solid; M.p. 165–166°C ( $\text{Et}_2\text{O}$ );  $R_f = 0.28$  (EtOAc/PE, 5/5);  $[\alpha]_D^{20} = -6.1$  ( $c = 0.8$ ,  $\text{CH}_2\text{Cl}_2$ );  $^1\text{H NMR}$  (400 MHz,  $\text{CDCl}_3$ ):  $\delta = 0.39$  (d, 3H,  $J = 6.6$  Hz,  $\text{CH}_3$ ), 0.85 (d, 3H,  $J = 6.7$  Hz,  $\text{CH}_3$ ), 0.86 (d, 3H,  $J = 6.2$  Hz,  $\text{CH}_3$ ), 0.89-0.92 (m, 1H), 1.03 (t, 1H,  $J_{\text{gem}} = 13.3$  Hz), 1.18-1.23 (m, 1H), 1.37 (ddd, 1H,  $J = 9.0$  Hz,  $J = 3.4$  Hz,  $J = 1.1$  Hz), 1.59-1.64 (m, 1H), 1.70-1.77 (m, 1H), 1.81-1.85 (m, 2H), 1.91-2.01 (m, 1H), 2.58 (s, 3H,  $\text{NCH}_3$ ), 3.11 (d, 1H,  $J = 5.1$  Hz), 3.52 (d, 1H,  $J = 5.2$  Hz), 3.88 (s, 3H,  $\text{OCH}_3$ ), 6.95 (dt, 2H,  $J = 9$  Hz,  $J = 2.7$  Hz, Harom), 8.07 (dt, 2H,  $J = 9$  Hz,  $J = 2.9$  Hz, Harom);  $^{13}\text{C NMR}$  (100 MHz,  $\text{CDCl}_3$ ):  $\delta = 18.3, 21.5, 21.8, 24.2, 24.5, 25.5$  ( $\text{NCH}_3$ ), 29.2, 34.8, 42.1, 43.0, 44.8, 49.6, 55.7 ( $\text{OCH}_3$ ), 85.6, 114.1, 130.7, 130.8, 164.2, 169.7 ( $\text{C}=\text{O}$ ), 191.9 ( $\text{C}=\text{O}$ ); HRMS (ESI):  $m/z$  calcd for  $\text{C}_{22}\text{H}_{30}\text{N}_2\text{NaO}_3[\text{M}+\text{Na}]^+$  393.2149; found 393.2140.

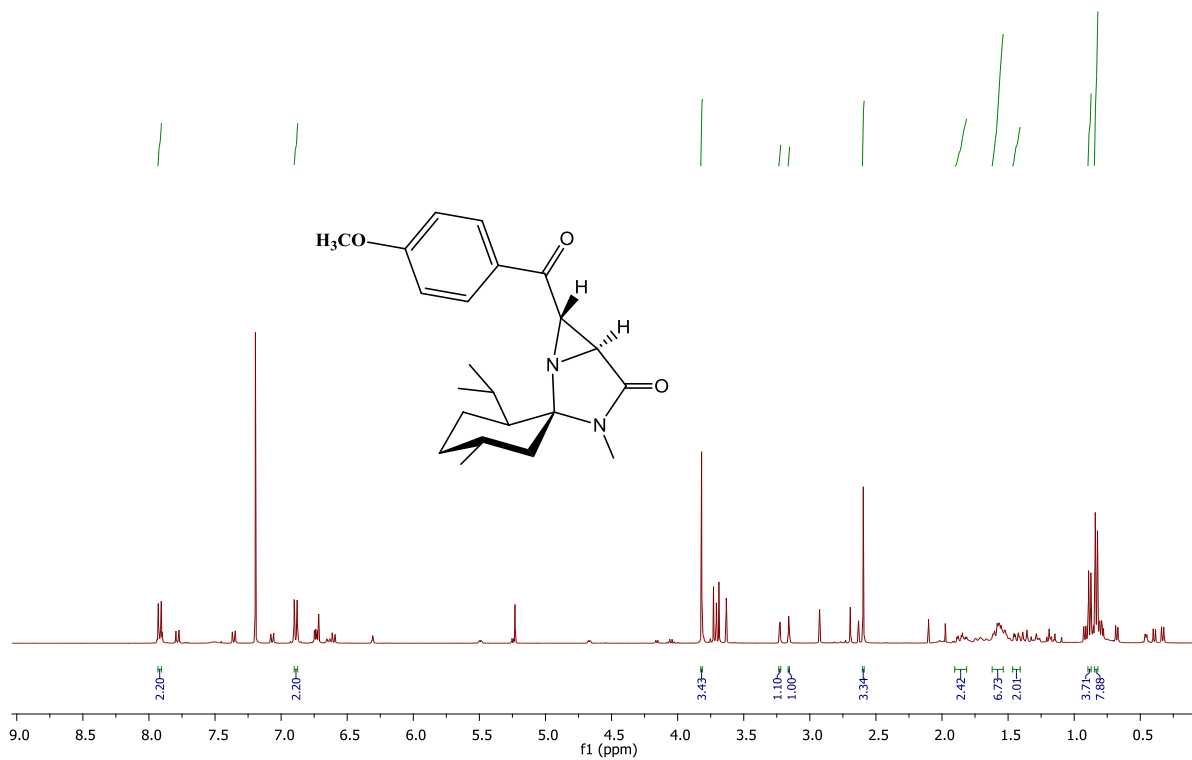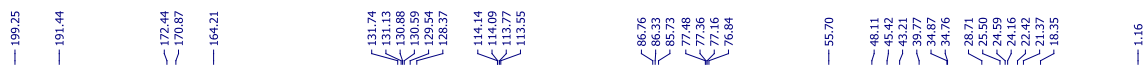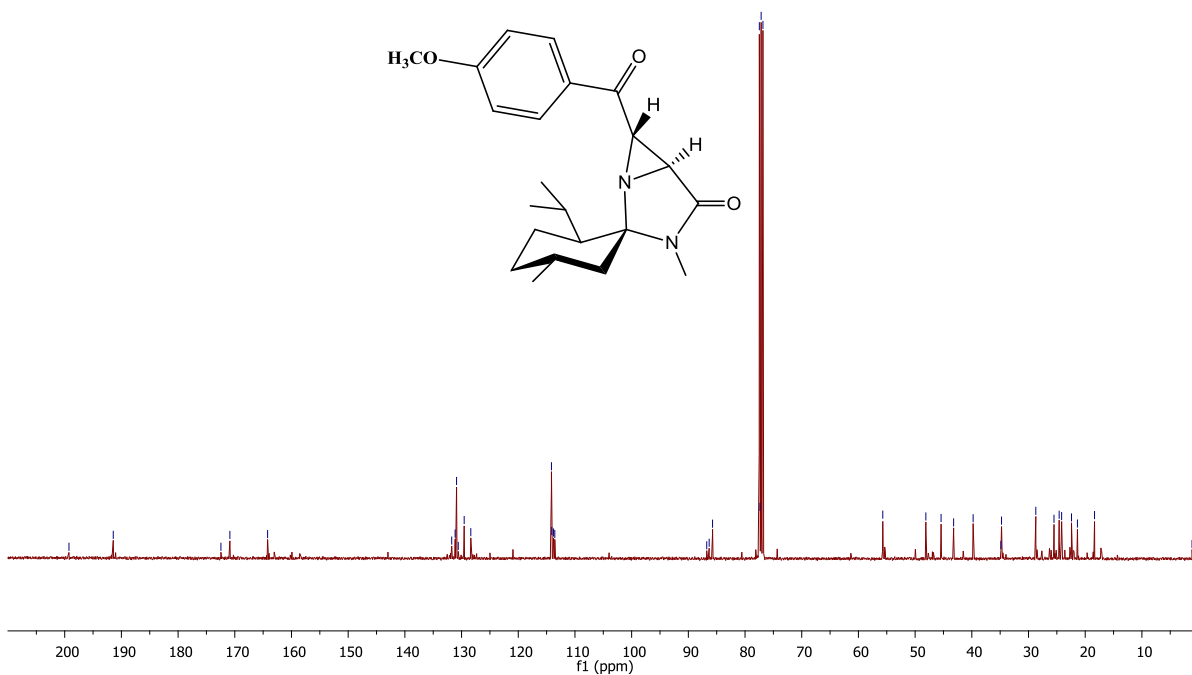

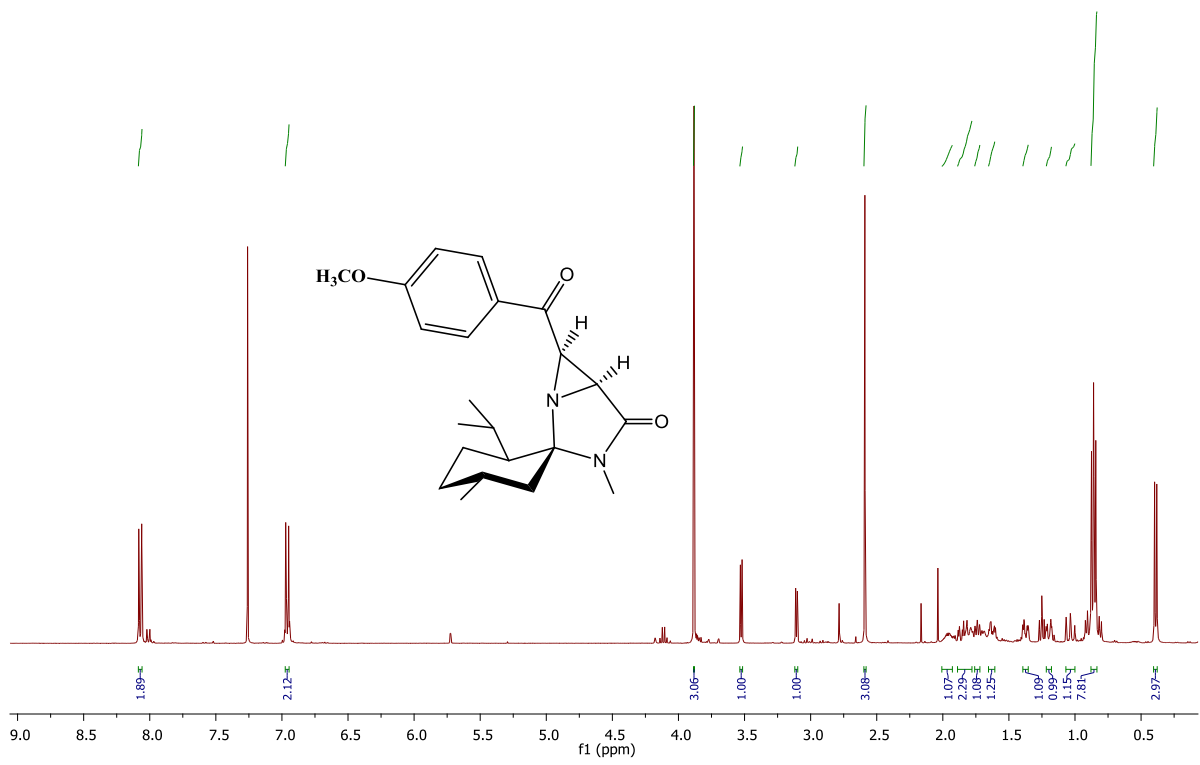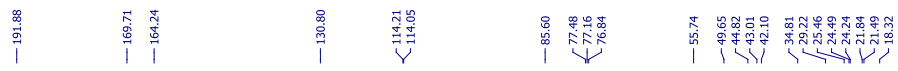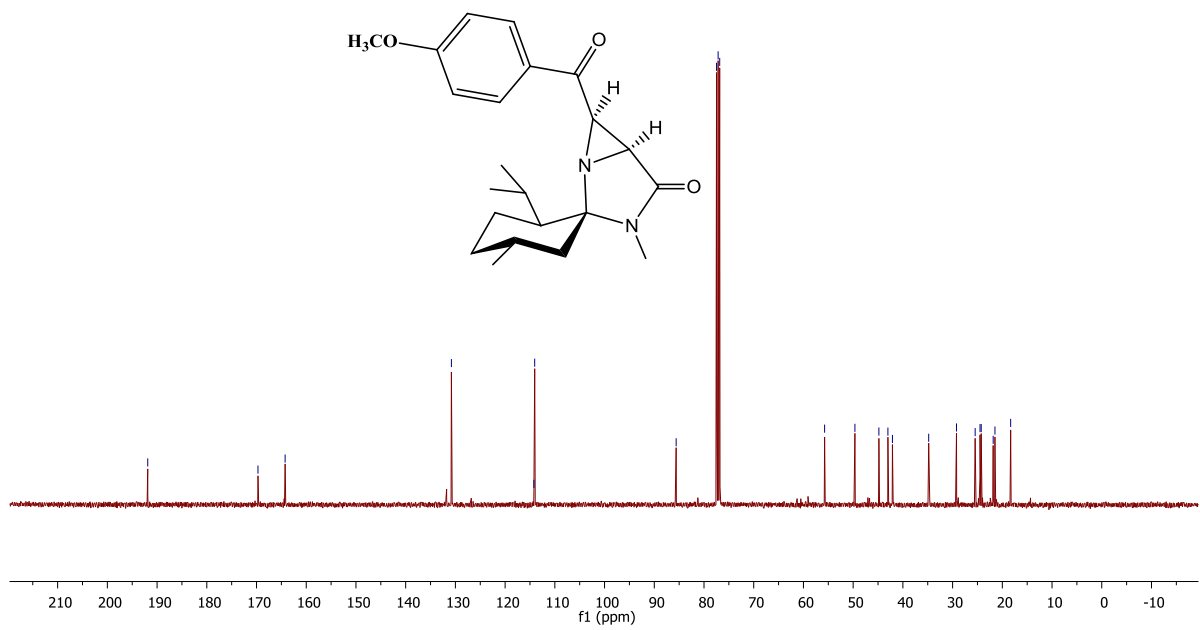



**(1'R,2'S,5S,5'R,6R)-2'-isopropyl-3,5'-dimethyl-6-(4-nitrobenzoyl)-1,3-diazaspiro[bicyclo[3.1.0]hexane-2,1'-cyclohexan]-4-one (4d)**

Obtained as a yellow solid (157 mg, 64%) following general procedure: alkyne **2d** (277 mg).

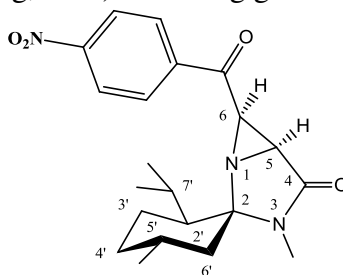

**(4d)** Yellow solid; M.p. 188–189°C (Et<sub>2</sub>O); R<sub>f</sub> = 0.56 (EtOAc/PE, 5/5); [α]<sub>D</sub><sup>20</sup> = +50.0 (c = 0.3, CH<sub>2</sub>Cl<sub>2</sub>); <sup>1</sup>H NMR (400 MHz, CDCl<sub>3</sub>): δ = 0.91 (d, 3H, J = 4.1 Hz, CH<sub>3</sub>), 0.92 (d, 3H, J = 3 Hz, CH<sub>3</sub>), 0.94 (d, 3H, J = 6.6 Hz, CH<sub>3</sub>), 0.96-1.00 (m, 1H), 1.46 (t, 1H, J<sub>gem</sub> = 12.9 Hz), 1.53 (ddd, 1H, J = 9.0 Hz, J = 3.4 Hz, J = 1.2 Hz), 1.62-1.67 (m, 3H), 1.82-1.96 (m, 3H), 2.67 (s, 3H, NCH<sub>3</sub>), 3.21 (d, 1H, J = 2.0 Hz), 3.28 (d, 1H, J = 1.7 Hz), 8.15 (dt, 2H, J = 9.0 Hz, J = 2.2 Hz, Harom), 8.34 (dt, 2H, J = 8.9 Hz, J = 2.2 Hz, Harom); <sup>13</sup>C NMR (100 MHz, CDCl<sub>3</sub>): δ = 18.3, 21.5, 22.4, 24.1, 24.5, 25.6 (NCH<sub>3</sub>), 28.9, 34.7, 40.7, 43.1, 46.0, 48.1, 85.9, 124.1, 129.6, 140.7, 150.7, 169.9 (C=O), 192.3 (C=O); HRMS (ESI): m/z calcd for C<sub>21</sub>H<sub>28</sub>N<sub>3</sub>O<sub>4</sub>[M+H]<sup>+</sup> 386.2074; found 386.2074.

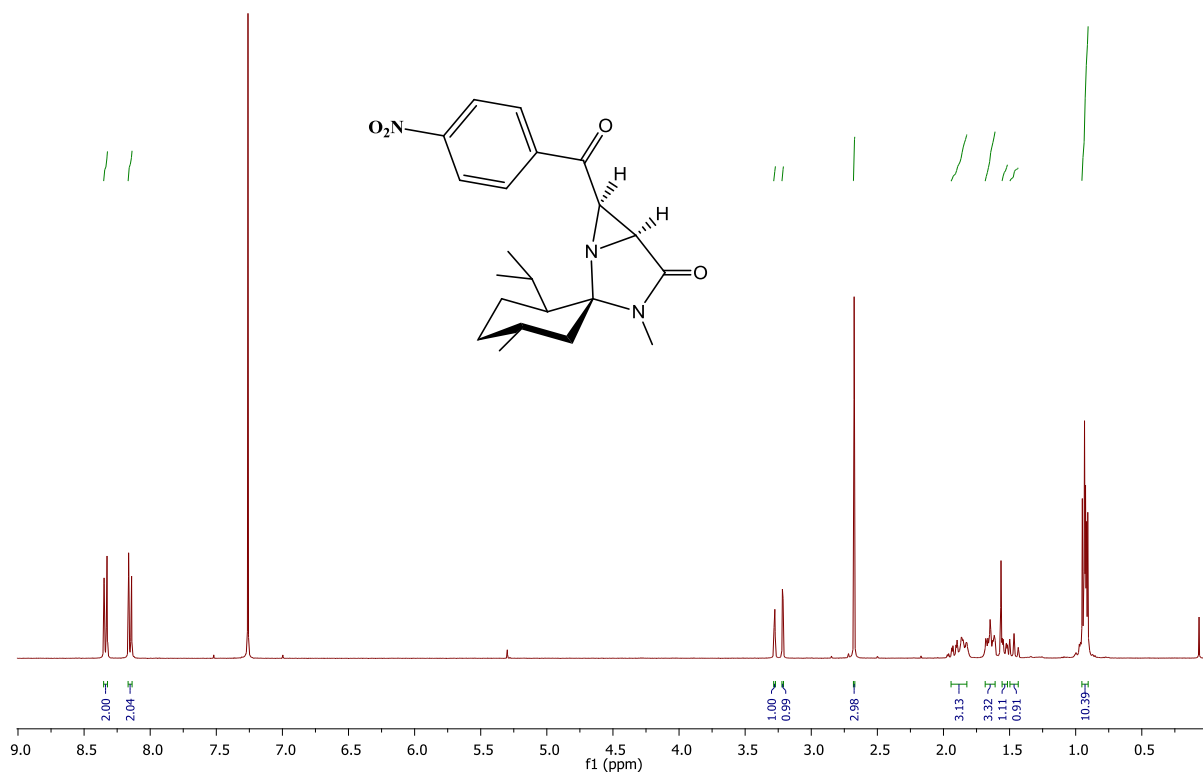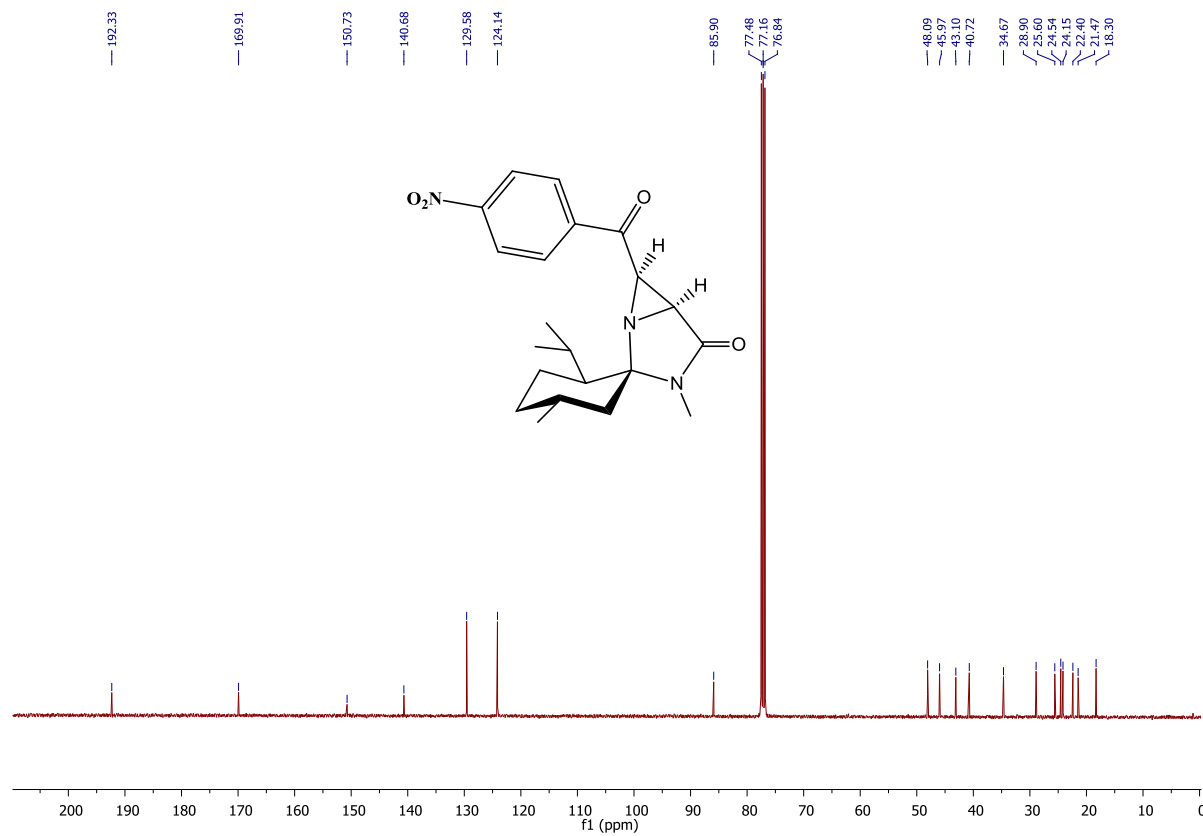

**(1'R,2'S,5S,5'R,6S)-2'-isopropyl-6-(6-methoxy-2-naphthoyl)-3,5'-dimethyl-1,3-diazaspiro[bicyclo[3.1.0]hexane-2,1'-cyclohexan]-4-one (3e) and (1'R,2'S,5S,5'R,6R)-2'-isopropyl-6-(6-methoxy-2-naphthoyl)-3,5'-dimethyl-1,3-diazaspiro[bicyclo[3.1.0]hexane-2,1'-cyclohexan]-4-one (4e)**

Compounds **3e** (50 mg, 12%) and **4e** (215 mg, 51%) were obtained following general procedure: alkyne **2e** (305 mg).

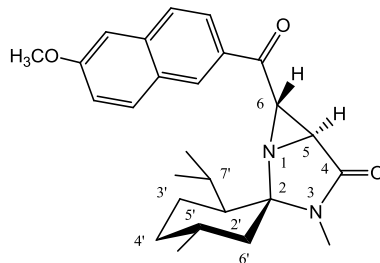

**(3e)** Yellow amorphous solid;  $R_f = 0.54$  (EtOAc/PE, 5/5);  $[\alpha]_D^{20} = +17.1$  ( $c = 1.4, \text{CH}_2\text{Cl}_2$ );  $^1\text{H}$  NMR (400 MHz,  $\text{CDCl}_3$ ):  $\delta = 0.90$  (d, 3H,  $J = 2.0$  Hz,  $\text{CH}_3$ ),  $0.91$  (d, 3H,  $J = 2.4$  Hz,  $\text{CH}_3$ ), **0.93-0.95** (m, 1H),  $0.97$  (d, 3H,  $J = 6.9$  Hz,  $\text{CH}_3$ ),  $1.46$  (t, 1H,  $J_{\text{gem}} = 12.9$  Hz),  $1.50$ - $1.54$  (ddd, 1H,  $J = 9.0$  Hz,  $J = 3.5$  Hz,  $J = 1.3$  Hz),  $1.59$ - $1.65$  (m, 1H),  $1.76$ - $1.80$  (m, 1H),  $1.73$ - $1.80$  (m, 2H),  $1.86$ - $2.00$  (m, 2H),  $2.69$  (s, 3H,  $\text{NCH}_3$ ),  $3.35$  (d, 1H,  $J = 1.8$  Hz),  $3.38$  (d, 1H,  $J = 2.0$  Hz),  $3.94$  (s, 3H,  $\text{OCH}_3$ ),  $7.16$  (d, 1H,  $J = 2.4$  Hz, Harom),  $7.19$ - $7.22$  (dd, 1H,  $J = 8.9$  Hz,  $J = 2.5$  Hz, Harom),  $7.76$ - $7.79$  (d, 1H,  $J = 8.7$  Hz, Harom),  $7.83$  (d, 1H,  $J = 8.9$  Hz, Harom),  $7.99$  (dd, 1H,  $J = 8.6$  Hz,  $J = 1.8$  Hz, Harom),  $8.46$  (d, 1H,  $J = 1.3$  Hz, Harom);  $^{13}\text{C}$  NMR (100 MHz,  $\text{CDCl}_3$ ):  $\delta = 18.4$ ,  $21.4$ ,  $22.5$ ,  $24.1$ ,  $24.6$ ,  $25.5$  ( $\text{NCH}_3$ ),  $28.7$ ,  $34.7$ ,  $40.0$ ,  $43.2$ ,  $45.6$ ,  $48.1$ ,  $55.6$  ( $\text{OCH}_3$ ),  $85.8$ ,  $106.0$ ,  $120.2$ ,  $124.7$ ,  $127.6$ ,  $127.8$ ,  $130.3$ ,  $131.3$ ,  $131.9$ ,  $137.7$ ,  $160.3$ ,  $170.8$  ( $\text{C}=\text{O}$ ),  $192.6$  ( $\text{C}=\text{O}$ ); HRMS (ESI):  $m/z$  calcd for  $\text{C}_{26}\text{H}_{33}\text{N}_2\text{O}_3[\text{M}+\text{H}]^+$  421.2486; found 421.2484.

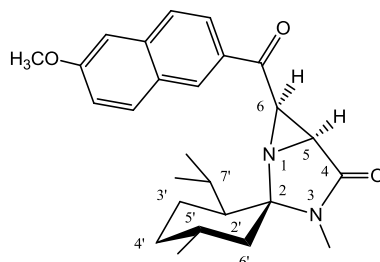

**(4e)** Amorphous solid;  $R_f = 0.34$  (EtOAc/PE, 5/5);  $[\alpha]_D^{20} = -40.0$  ( $c = 0.3, \text{CH}_2\text{Cl}_2$ );  $^1\text{H}$  NMR (400 MHz,  $\text{CDCl}_3$ ):  $\delta = 0.18$  (d, 3H,  $J = 6.6$  Hz,  $\text{CH}_3$ ),  $0.87$  (d, 3H,  $J = 1.8$  Hz,  $\text{CH}_3$ ),  $0.88$  (d, 3H,  $J = 1.6$  Hz,  $\text{CH}_3$ ), **0.91-0.92** (m, 1H),  $1.03$  (t, 1H,  $J_{\text{gem}} = 13.2$  Hz, H-6'a),  $1.20$ - $1.23$  (m, 1H),  $1.39$  (ddd, 1H,  $J = 8.9$  Hz,  $J = 3.4$  Hz,  $J = 1.1$  Hz, H-2'),  $1.62$ - $1.67$  (m, 1H, H-3'a),  $1.73$ - $1.80$  (m, 2H),  $1.85$ - $1.96$  (m, 1H),  $1.98$ - $2.02$  (m, 1H),  $2.60$  (s, 3H,  $\text{NCH}_3$ ),  $3.16$  (d, 1H,  $J = 5.1$  Hz, H-5),  $3.69$  (d, 1H,  $J = 5.1$  Hz, H-6),  $3.95$  (s, 3H,  $\text{OCH}_3$ ),  $7.15$  (d, 1H,  $J = 2.4$  Hz, H-arom),  $7.20$ - $7.23$  (dd, 1H,  $J = 8.9$  Hz,  $J = 2.5$  Hz, Harom),  $7.78$  (d, 1H,  $J = 8.7$  Hz, Harom),  $7.86$  (d, 1H,  $J = 9.0$  Hz, Harom),  $8.05$  (dd, 1H,  $J = 8.6$  Hz,  $J = 1.8$  Hz, Harom),  $8.59$  (d, 1H,  $J = 1.4$  Hz, Harom);  $^{13}\text{C}$  NMR (100 MHz,  $\text{CDCl}_3$ ):  $\delta = 18.3$ ,  $21.2$ ,  $21.9$ ,  $24.2$ ,  $24.5$ ,  $25.5$  ( $\text{NCH}_3$ ),  $29.3$ ,  $34.8$ ,  $42.2$ ,  $43.2$ ,  $44.8$ ,  $49.7$ ,  $55.6$  ( $\text{OCH}_3$ ),  $85.7$ ,  $106.0$ ,  $120.3$ ,  $124.4$ ,  $127.5$ ,  $127.8$ ,  $130.4$ ,  $131.4$ ,  $133.0$ ,  $137.8$ ,  $160.3$ ,  $169.7$  ( $\text{C}=\text{O}$ ),  $193.0$  ( $\text{C}=\text{O}$ ); HRMS (ESI):  $m/z$  calcd for  $\text{C}_{26}\text{H}_{32}\text{N}_2\text{NaO}_3[\text{M}+\text{Na}]^+$  443.2305; found 443.2291.

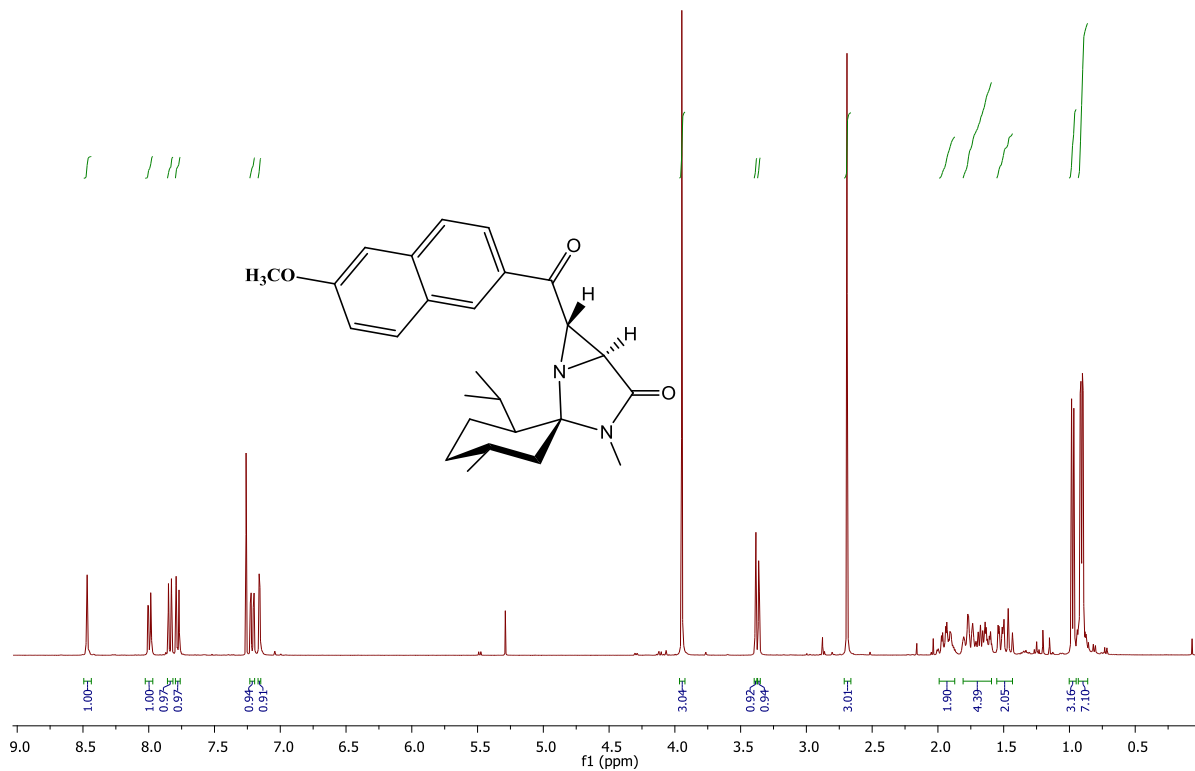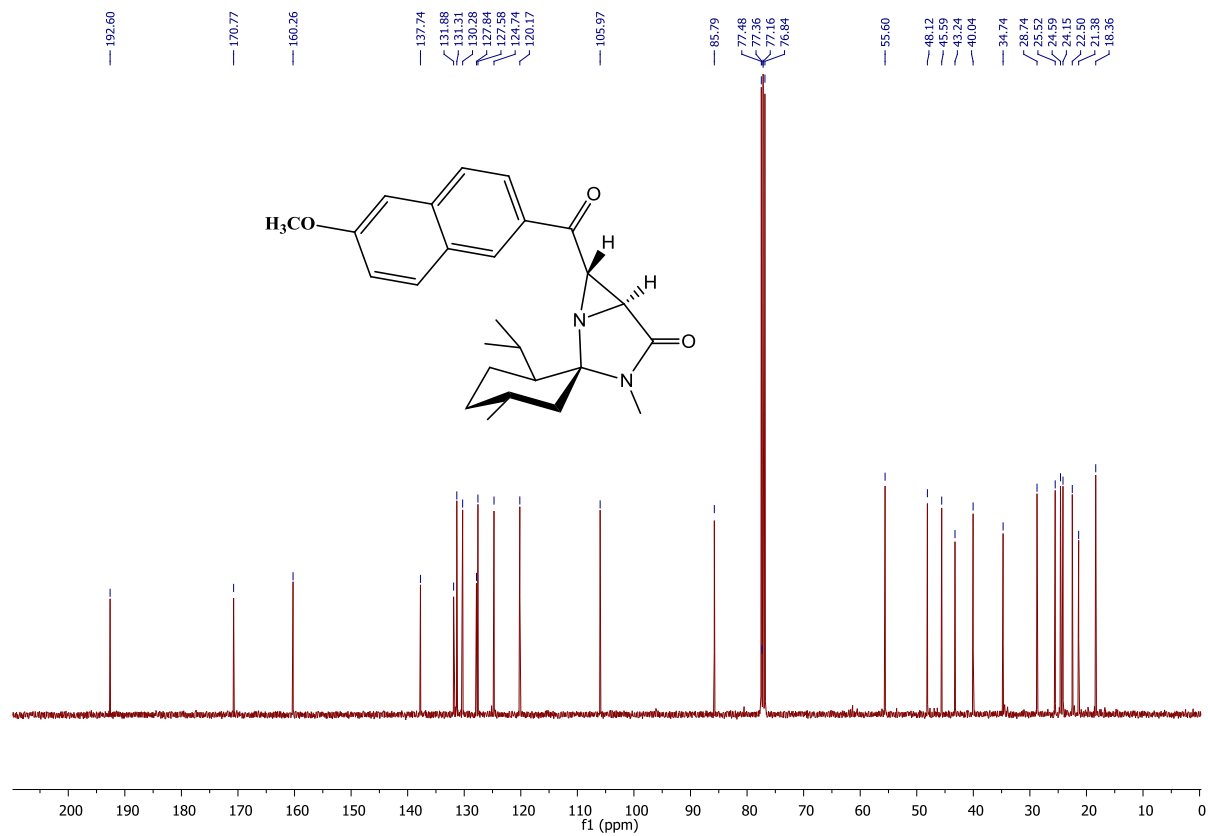

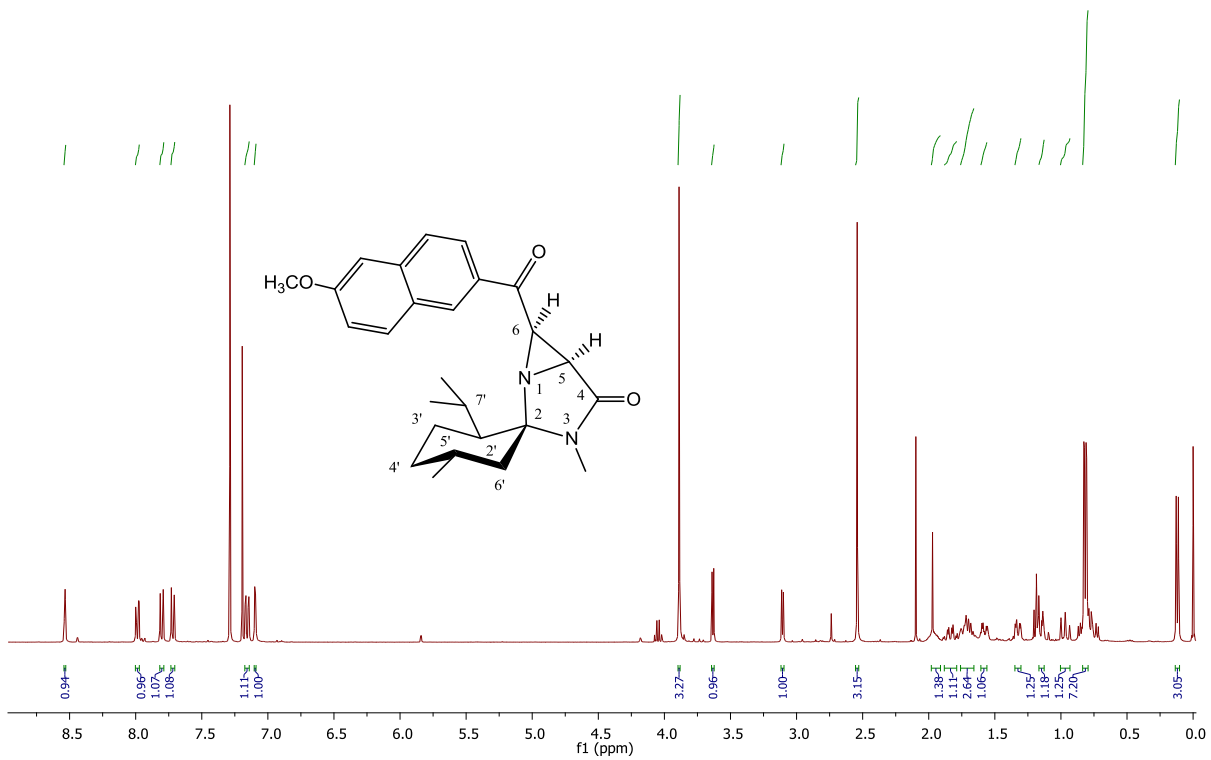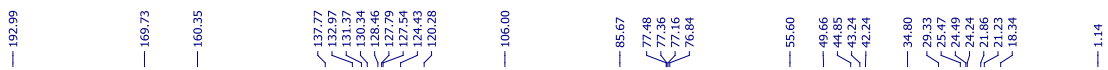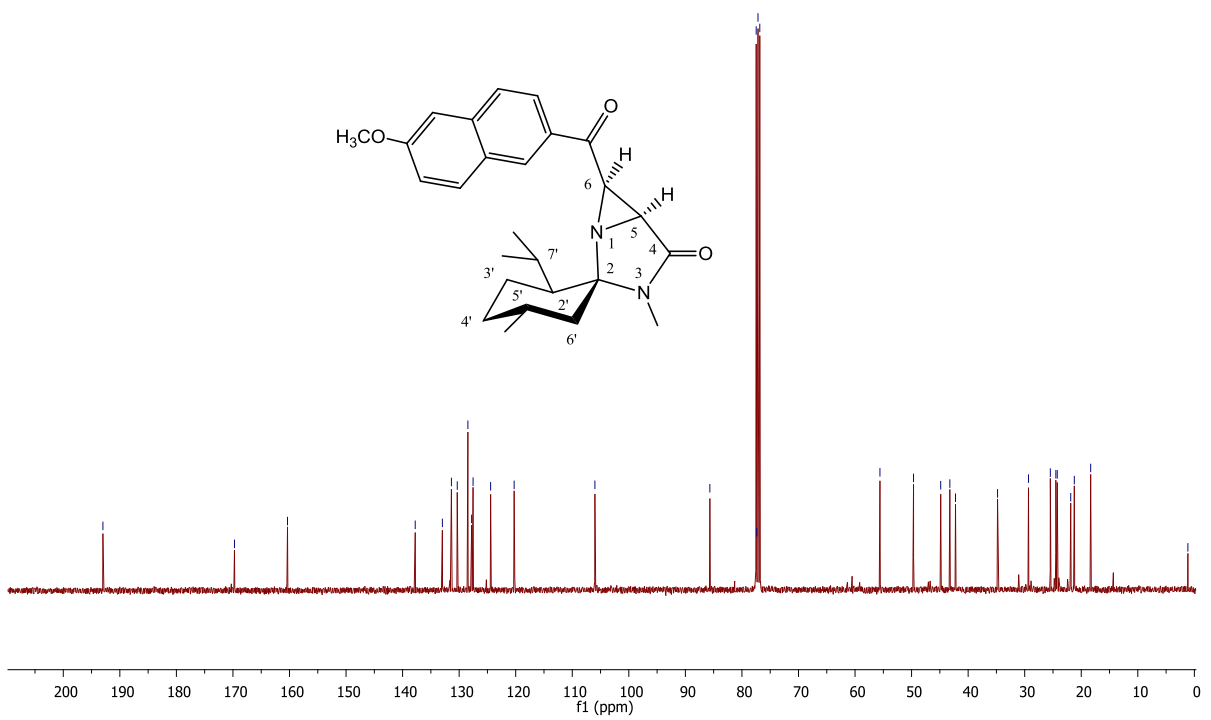

Supplement: mmc1 [file mmc1.pdf]
